# Supplementary material for: Gestational Diabetes Mellitus: Association with Maternal and Neonatal Complications
Source: MDPI journal article supplement (doi:10.3390/medicina59122096), 2023-11-29
Supplement: s1 [file s1]

**Supplementary Table S3.** Univariate and multivariate logistic regression analysis demonstrating the association of pre-existing diabetes mellitus (DM) with neonatal complications

| Neonatal adverse outcomes | Univariate analysis |         | Multivariate analysis |         |
|---------------------------|---------------------|---------|-----------------------|---------|
|                           | OR (95% CI)         | P value | OR (96%CI)            | P value |
| Admission to NICU         | 6.53 (5.47-7.78)    | <0.001  | 4.39 (3.63-5.32)      | <0.001  |
| HIE                       | 5.04 (2.21-11.51)   | <0.001  | 5.09 (2.19-11.80)     | <0.001  |
| Hypoglycaemia             | 25.02 (19.81-31.61) | <0.001  | 12.29 (9.39-16.08)    | <0.001  |
| RDS                       | 6.14 (4.85-7.76)    | <0.001  | 2.39 (1.85-3.09)      | <0.001  |
| Jaundice                  | 6.55 (5.36-8.01)    | <0.001  | 4.10 (3.31-5.09)      | <0.001  |
| Neonatal death            | 5.70 (1.37-23.77)   | 0.017   | 3.19 (0.72-14.71)     | 0.127   |

OR=odds ratio; CI=confidence interval; NICU=Neonatal intensive care unit; HIE=Hypoxic ischaemic encephalopathy; RDS=Respiratory distress syndrome
