# Supplementary material for: Gestational Diabetes Mellitus: Association with Maternal and Neonatal Complications
Source: MDPI journal article supplement (doi:10.3390/medicina59122096), 2023-11-29
Supplement: s1 [file s1]

**Supplementary Table S2.** Univariate and multivariate logistic regression analysis demonstrating the association of pre-existing diabetes mellitus (DM) with intrapartum pregnancy complications.

| Intrapartum adverse outcomes    | Univariate analysis |         | Multivariate analysis |         |
|---------------------------------|---------------------|---------|-----------------------|---------|
|                                 | OR (95% CI)         | P value | OR (95% CI)           | P value |
| Mode of delivery                |                     |         |                       |         |
| Unassisted vaginal              | 0.23 (0.19-0.28)    | <0.001  | 0.30 (0.24-0.38)      | <0.001  |
| Operative vaginal               | 0.50 (0.33-0.75)    | 0.001   | 0.64 (0.42-0.98)      | 0.040   |
| Elective caesarean section      | 4.07 (3.39-4.90)    | <0.001  | 2.62 (2.12-3.23)      | <0.001  |
| Emergency caesarean section     | 2.37 (1.97-2.86)    | <0.001  | 1.46 (1.17-1.82)      | <0.001  |
| Failure to progress             | 1.49 (1.08-2.05)    | 0.014   | 1.16 (0.83-1.63)      | 0.389   |
| Fetal distress                  | 2.56 (1.79-2.85)    | <0.001  | 1.94 (1.51-2.50)      | <0.001  |
| Postpartum haemorrhage          |                     |         |                       |         |
| Moderate                        | 1.88 (1.45-2.44)    | <0.001  | 0.90 (0.68-1.18)      | 0.431   |
| Severe                          | 1.79 (1.02-3.11)    | 0.041   | 0.96 (0.54-1.69)      | 0.880   |
| Obstetric anal sphincter injury | 0.87 (0.41-1.84)    | 0.710   | -                     | -       |
| Shoulder dystocia               |                     |         |                       |         |
| All                             | 0.67 (0.25-1.81)    | 0.433   | -                     | -       |
| Severe                          | 2.14 (0.53-8.73)    | 0.287   | -                     | -       |

OR=odds ratio; CI=confidence interval
