# Supplementary material for: Gestational Diabetes Mellitus: Association with Maternal and Neonatal Complications
Source: MDPI journal article supplement (doi:10.3390/medicina59122096), 2023-11-29
Supplement: s1 [file s1]

**Supplementary Table S1.** Univariate and multivariate logistic regression analysis demonstrating the association of pre-existing diabetes mellitus (DM) with antenatal pregnancy complications.

| Antenatal adverse outcomes       | Univariate analysis |         | Multivariate analysis |         |
|----------------------------------|---------------------|---------|-----------------------|---------|
|                                  | OR (95% CI)         | P value | OR (95%CI)            | P value |
| Fetal defects - All              | 1.83 (1.21-2.77)    | 0.002   | 1.84 (1.21-2.80)      | 0.004   |
| Central nervous system           | 3.35 (1.37-8.21)    | 0.008   | 3.42 (1.39-8.41)      | 0.007   |
| Cardiovascular                   | 4.73 (2.69-8.30)    | <0.001  | 4.41 (2.50-7.78)      | <0.001  |
| Renal                            | 0.94 (0.30-2.94)    | 0.915   | -                     | -       |
| Gastrointestinal                 | -                   | -       | -                     | -       |
| Musculoskeletal                  | 0.85 (0.12-6.07)    | 0.868   | -                     | -       |
| Genetic                          | -                   | -       | -                     | -       |
| Fetal death                      |                     |         |                       |         |
| Miscarriage                      | 0.69 (0.26-1.84)    | 0.454   | -                     | -       |
| Stillbirth                       | 5.72 (2.91-11.27)   | <0.001  | 4.65 (2.31-9.35)      | <0.001  |
| Preterm delivery                 |                     |         |                       |         |
| <32 weeks                        | 4.39 (2.78-6.94)    | <0.001  | 4.31 (2.65-7.01)      | <0.001  |
| <37 weeks                        | 8.66 (7.20-10.41)   | <0.001  | 7.98 (6.52-9.77)      | <0.001  |
| Fetal growth abnormalities       |                     |         |                       |         |
| SGA <10 <sup>th</sup> percentile | 0.60 (0.43-0.85)    | 0.004   | 0.57 (0.39-0.82)      | 0.003   |
| LGA >90 <sup>th</sup> percentile | 5.40 (4.51-6.46)    | <0.001  | 4.78 (3.87-5.90)      | <0.001  |
| Polyhydramnios                   |                     | <0.001  |                       | <0.001  |
| Mild                             | 7.78 (5.95-10.18)   | <0.001  | 3.99 (2.97-5.36)      | <0.001  |
| Moderate/severe                  | 12.99 (6.21-27.18)  | <0.001  | 6.75 (3.15-14.47)     | <0.001  |
| Obstetric complications          |                     |         |                       |         |
| Gestational hypertension         | 1.22 (0.65-2.30)    | 0.531   | -                     | -       |
| Preeclampsia                     | 3.88 (2.82-5.33)    | <0.001  | 2.97 (2.09-4.21)      | <0.001  |

OR=odds ratio; CI=confidence interval; SGA=small for gestation; LGA=large for gestation
